# Supplementary material
Source: publisher figshare collection journal article supplement (https://sage.figshare.com/ndownloader/files/20272674)
Supplement: Supplementary file 1 [file 20272674]

# Supplementary Table 1

## *Convergent validity correlations between each operationalization of Self-Complexity*

|                                     | 1      | 2      | 3      | 4      | 5 |
|-------------------------------------|--------|--------|--------|--------|---|
| 1. IQV                              |        |        |        | .      |   |
| 2. # domains in top 10 social roles | .89*** |        |        |        |   |
| 3. # domains in top 5 social roles  | .60*** | .49*** |        |        |   |
| 4. # domains in top 3 social roles  | .36*** | .31*** | .68*** |        |   |
| 5. Max. # repeated role domains (R) | .91*** | .69*** | .40*** | .62*** |   |

*Note.* N=325. (R) = reverse coded variable.

\*\*\* $p < .001$

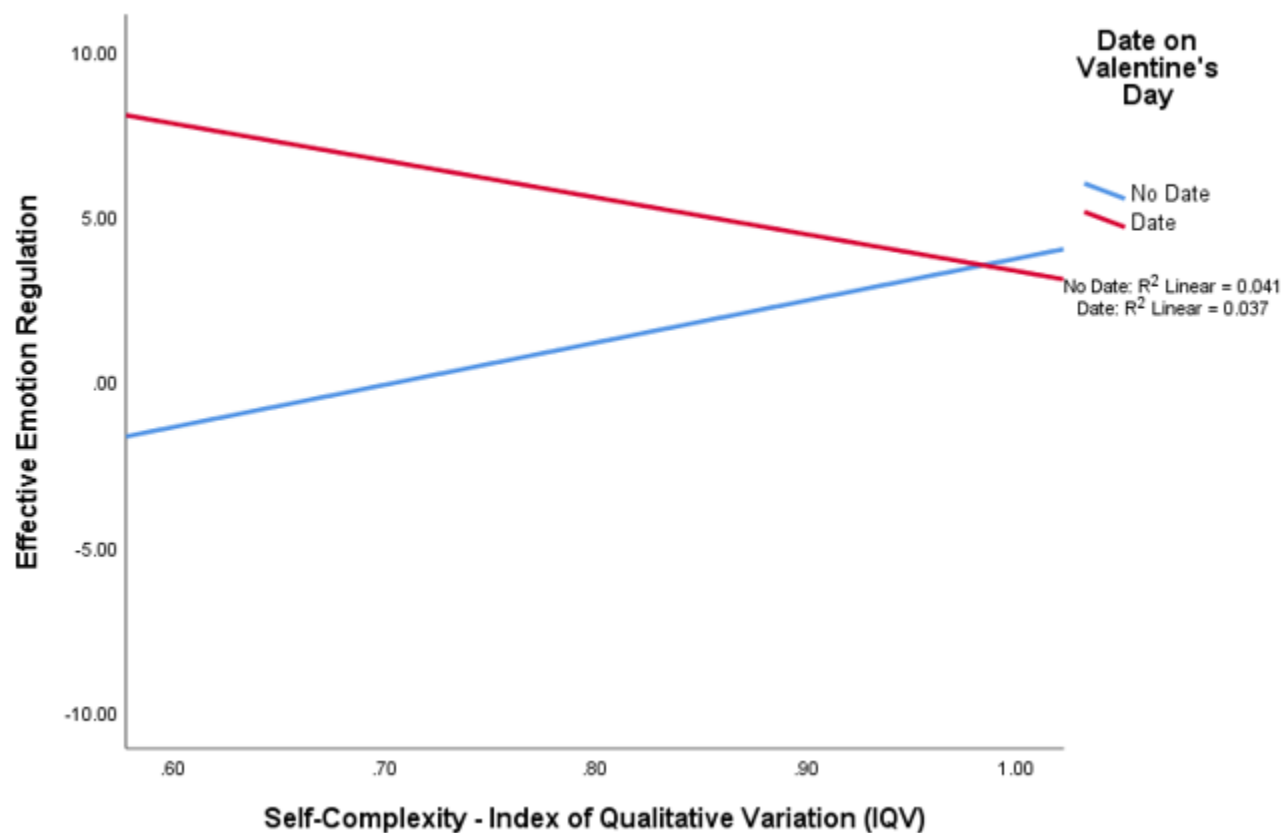

Supplementary Figure 1. Correlation between Self Complexity and Effective Coping differs by Dater Status

*Note.* This figure depicts the slopes of the correlation coefficient between self-complexity and use of effective emotional regulation strategies, separated by subgroup (daters vs. non-daters).

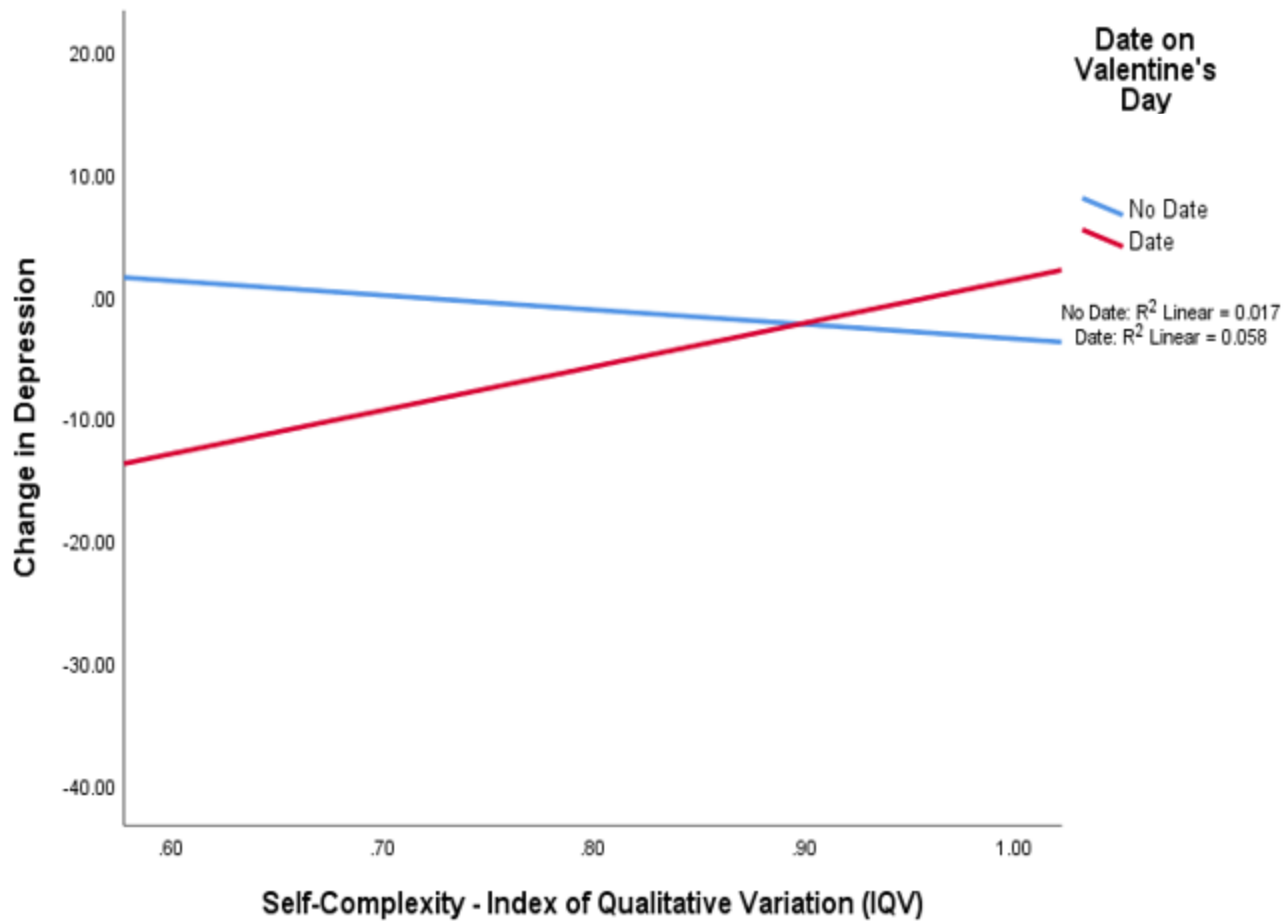

Supplementary Figure 2. Correlation between Self Complexity and Depression ( $\Delta$ ) differs by Dater Status

*Note.* This figure depicts the slopes of the correlation coefficient between self-complexity and changes in depression, separated by subgroup (daters vs. non-daters).

Supplementary Table 2

*Correlations between Self-complexity and Socio-Emotional Adjustment by Dater Status*

| Outcome Measure            | Daters<br>( <i>n</i> = 88)                       |                 | Non-Daters<br>( <i>n</i> = 237)                  |                 |
|----------------------------|--------------------------------------------------|-----------------|--------------------------------------------------|-----------------|
|                            | Correlation ( <i>r</i> ) with<br>Self-Complexity | <i>p</i> -value | Correlation ( <i>r</i> ) with<br>Self-Complexity | <i>p</i> -value |
| Socio-Emotional Adjustment | -.32                                             | .003            | .21                                              | .001            |

*Note.* *N* = 325. Socio-Emotional Adjustment is the PCA composite of emotional regulation strategies and depression outcome variables with statistically-significant effects.
